# Supplementary material for: A Novel Biocompatible Titanium–Gadolinium Quantum Dot as a Bacterial Detecting Agent with High Antibacterial Activity
Source: MDPI journal article supplement (doi:10.3390/nano10040778), 2020-04-17
Supplement: s1 [file s1]

## Supplementary Material

# A Novel Biocompatible Titanium–Gadolinium Quantum Dot as a Bacterial Detecting Agent with High Antibacterial Activity

Vishma Pratap Sur <sup>1,2,\*†</sup>, Aninda Mazumdar <sup>1,2†</sup>, Amirmansoor Ashrafi <sup>1,2</sup>, Atripan Mukherjee <sup>1,2</sup>, Vedran Milosavljevic <sup>1,2</sup>, Hana Michalkova <sup>1</sup>, Pavel Kopel <sup>3</sup>, Lukáš Richtera <sup>1,2</sup> and Amitava Moulick <sup>1,2,\*</sup>

<sup>1</sup> Department of Chemistry and Biochemistry, Faculty of AgriSciences, Mendel University in Brno, Zemedelska 1/1665, 61300 Brno, Czech Republic; xmazumda@mendelu.cz (A.M.); amirmansoor.ashrafi@mendelu.cz (A.A.); atripan@gmail.com (A.M.); grizlidripac@gmail.com (V.M.); hanabuchtelova@gmail.com (H.M.); oliver@centrum.cz (L.R.)

<sup>2</sup> Central European Institute of Technology (CEITEC), Brno University of Technology, Purkynova 123, 62100 Brno-Královo Pole, Czech Republic

<sup>3</sup> Department of Inorganic Chemistry, Faculty of Science, Palacky University, 17. listopadu 12, CZ-771 46 Olomouc, Czech Republic; paulko@centrum.cz

\* Correspondence: vishmapratapsur@gmail.com or xsur@mendelu.cz (V.P.S); amitava.moulick@mendelu.cz or amitavamoulick@gmail.com (A.M); Tel.: +420-545-133-350 (V.P.S.); +420-545-133-350 (A.M.)

† These authors contributed equally to this work.

Received: 18 March 2020; Accepted: 16 April 2020; Published: 17 April 2020

## 1. FTIR analysis of TGQDs

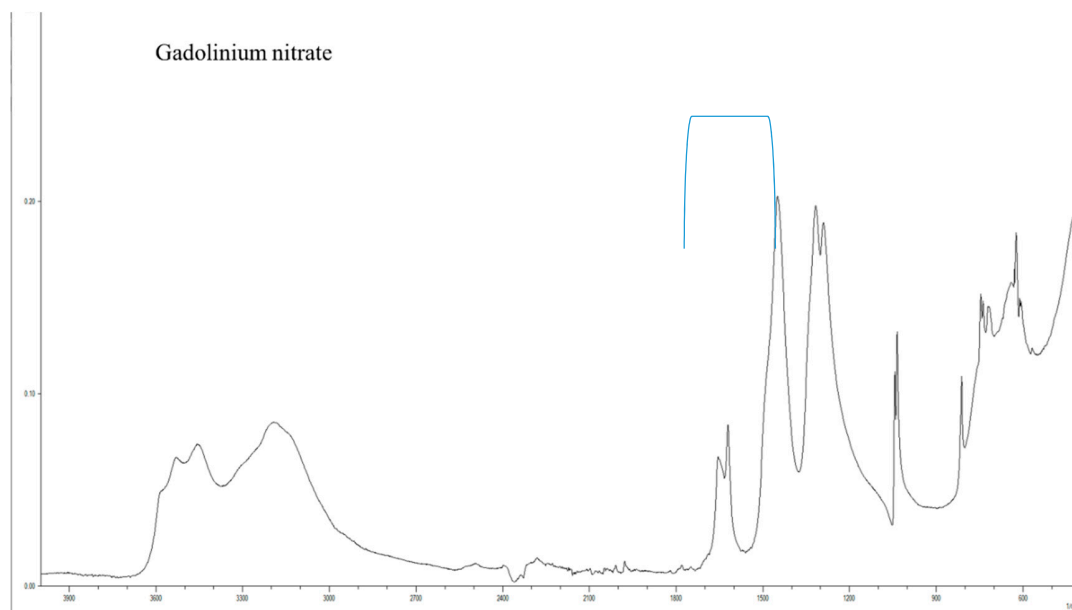

**Figure S1.** FTIR spectrum for Gadolinium Nitrate.

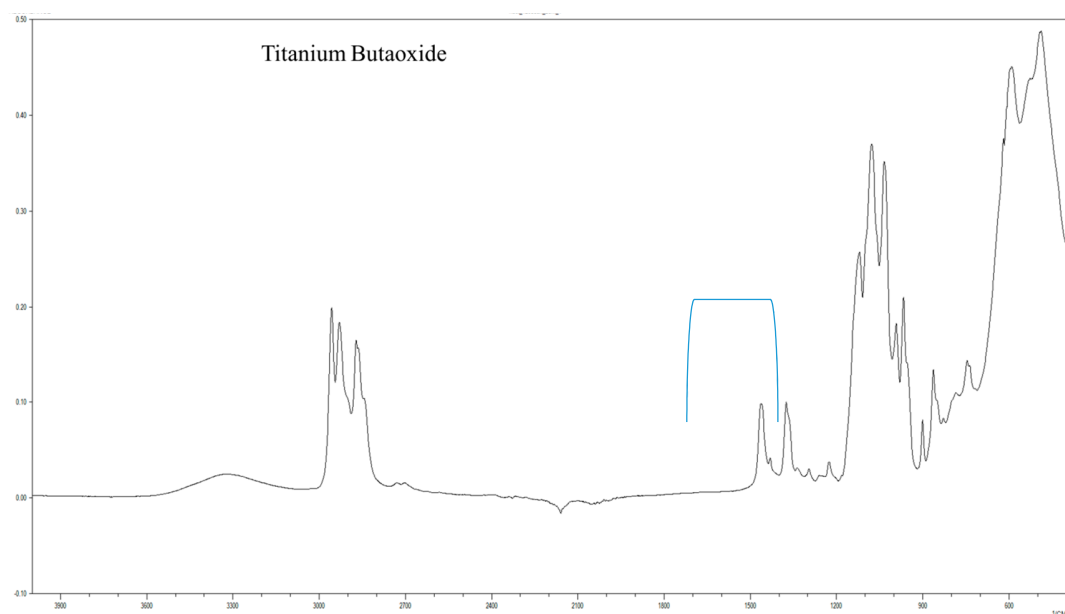

**FigureS2.** FTIR spectrum for Titanium Butoxide.

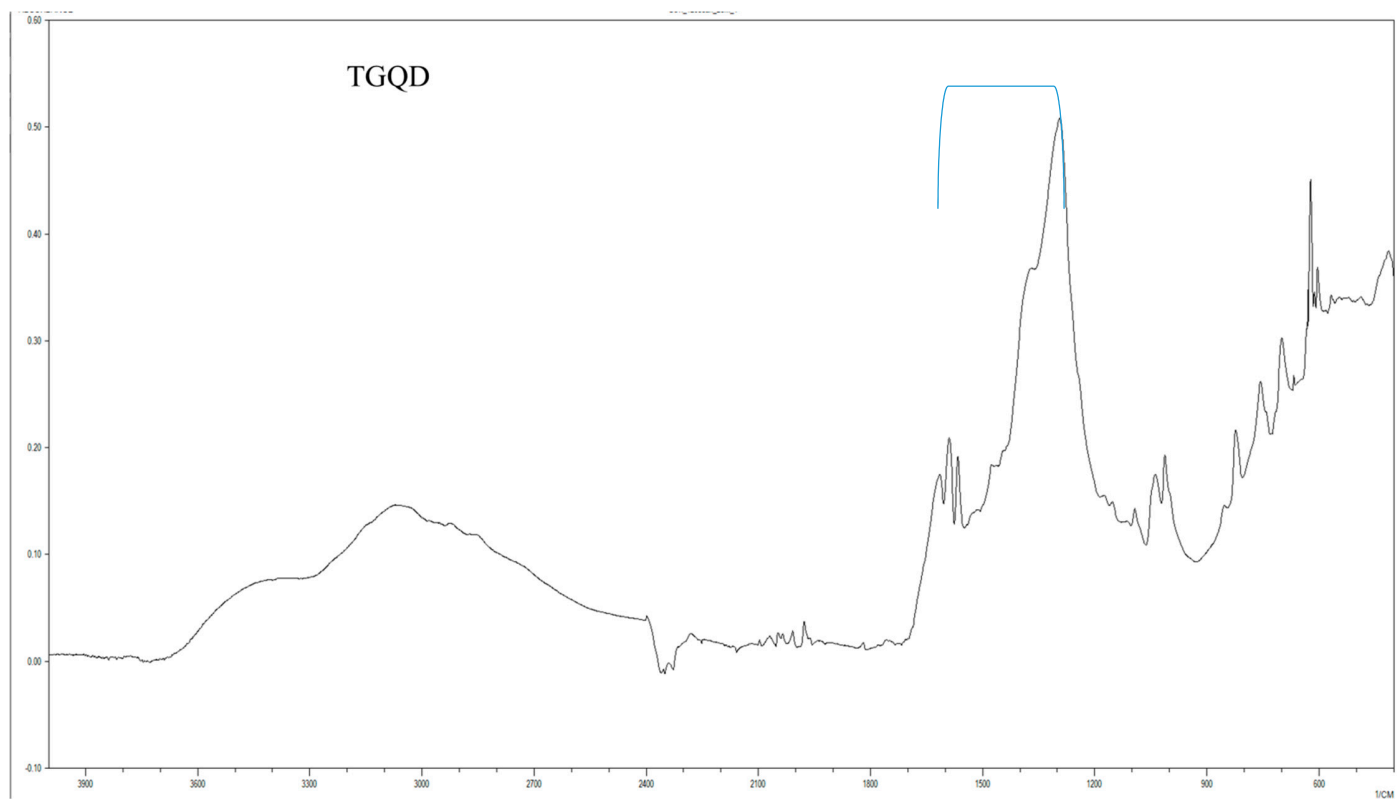

**Figure S3.** FTIR spectrum for synthesized TGQD.

## 2. Bacterial detection by absorbance

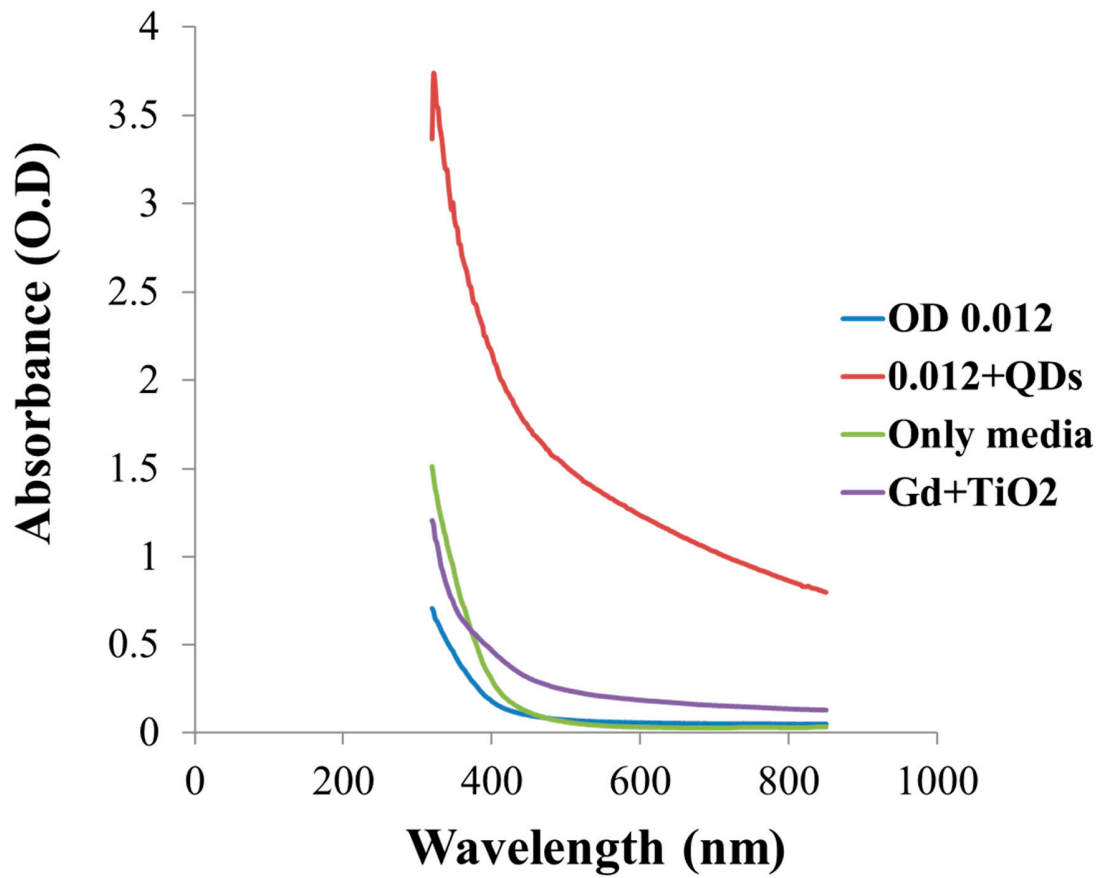

**FigureS4.** Bacterial detection by measuring absorbance spectra in presence of TGQD.

### 3. Bacterial cell and Human cell staining

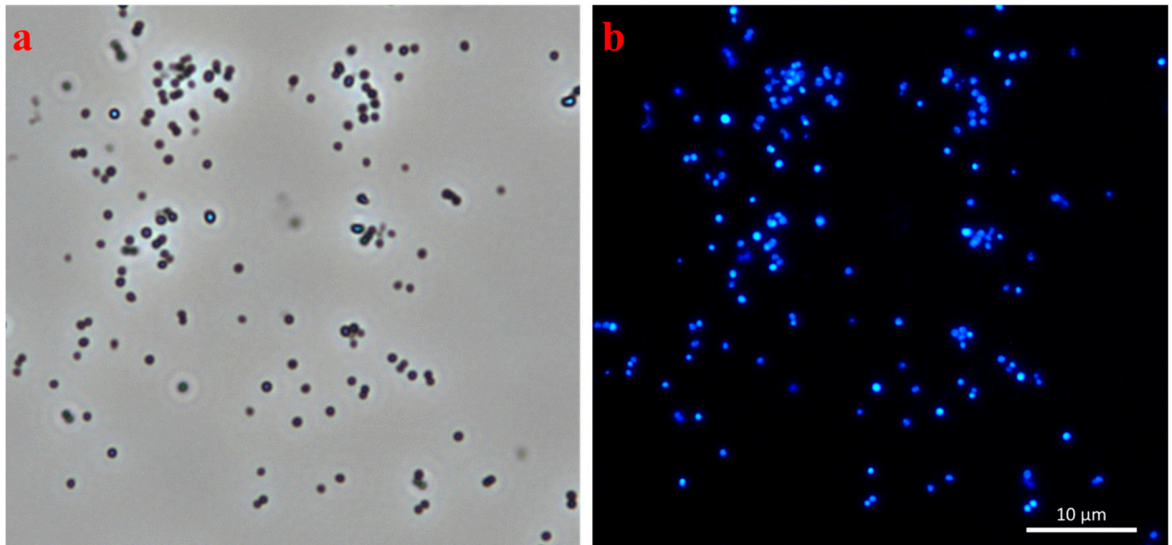

**Figure S5.** Bacterial cells stained with TGQD. (a) Phase contrast optical microscopic image of VRSA; (b) TGQD stained VRSA under fluorescence microscopic UV filter.

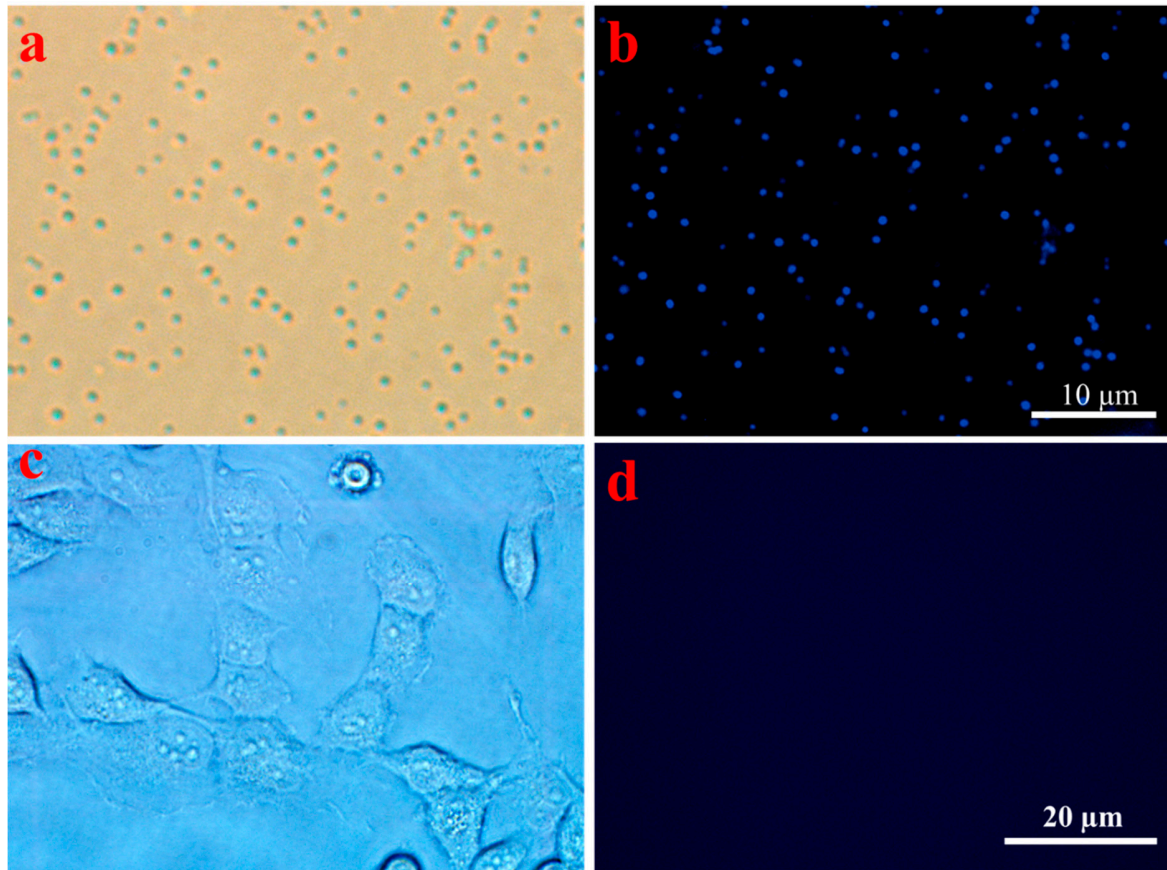

**Figure S6.** Bacterial cells and Human PNT1A cells were stained with SYTO9 and TGQD. optical microscopy image of bacterial cells (a); same field with TGQD staining (b); optical microscopy image of PNT1A cells (c). (d); PNT1A cells incubated with TGQD however TGQD did not stain the PNT1A cells (d).

#### 4. Cytotoxicity of TGQDs

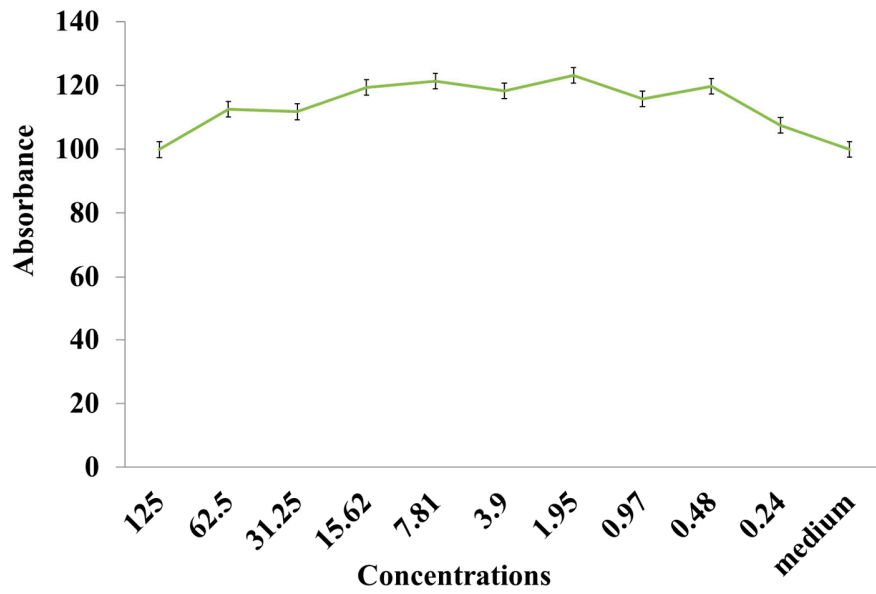

Figure S7. MTT assay against HBL-100 cell line.

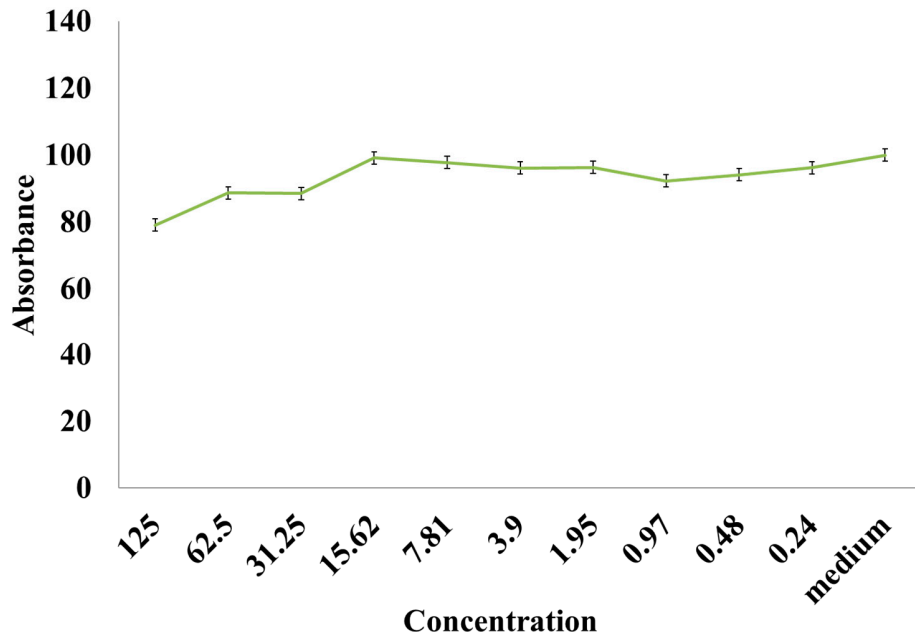

Figure S8. MTT assay against MDA-MB-231 cell line.
